# Supplementary material for: Effects of large-scale amino acid substitution in the polypeptide tether connecting the heme and molybdenum domains on catalysis in human sulfite oxidase
Source: Royal Society of Chemistry journal article supplement (doi:10.1039/c0mt00021c), 2010-01-01
Supplement: c0mt00021c.pdf [file c0mt00021c.pdf]

# Supporting Information

## Effects of Large Scale Amino Acid Substitution in the Polypeptide Tether Connecting the Heme and Molybdenum Domains on Catalysis in Human Sulfite Oxidase.

**Kayunta Johnson-Winters, Anna R. Nordstrom, Amanda C. Davis, Gordon Tollin\* and John H. Enemark\***

\* Department of Chemistry and Biochemistry, The University of Arizona, 1306 E.

University Blvd., Tucson, Arizona 85721

\* *Phone: 520-621-2245, Fax: 520-626-8065, E mail: [jenemark@u.arizona.edu](mailto:jenemark@u.arizona.edu)*

\* *Phone: 520-621-3447, Fax: 520-626-8065, E mail: [gtollin@u.arizona.edu](mailto:gtollin@u.arizona.edu)*

† This research was supported by NIH Grant GM-037773 (to JHE); Ruth L. Kirchstein-NIH Fellowship 1F32GM082136-01 (to KJW); ACD is a participant in the Undergraduate Biology Research Program, supported in part by a grant to the University of Arizona from the Howard Hughes Medical Institute (52005889).

### Table of Contents:

| Page | Table | Title                                                                 |
|------|-------|-----------------------------------------------------------------------|
| 2    | S1    | Iron to Molybdenum Ratios determined using Inductively Coupled Plasma |
| 3    | S2    | Laser Flash Photolysis Results for HSO Chimera.                       |
| 4    | FS1   | CW EPR Spectra of HSO Chimera.                                        |

**Table S1 Iron to Molybdenum Ratios Determined using Inductively Coupled**

**Plasma**

| <b>HSO Mutant</b>  | <b>Iron to Molybdenum Ratio</b> |
|--------------------|---------------------------------|
| <b>HSO Chimera</b> | <b>0.70 ± 0.03</b>              |

Table S2 pH Dependence of Laser Flash Photolysis Results for HSO Chimera

|             |                                     | pH 6.8           | pH 7.0          | pH 7.4          | pH 7.61         |
|-------------|-------------------------------------|------------------|-----------------|-----------------|-----------------|
| HSO Chimera | $k_{\text{et}}$ ( $\text{s}^{-1}$ ) | $139 \pm 11$     | $146 \pm 8$     | $156 \pm 14$    | $94 \pm 4$      |
|             | $k_{\text{f}}$ ( $\text{s}^{-1}$ )  | $38 \pm 3$       | $43 \pm 2$      | $44 \pm 5$      | $33 \pm 1$      |
|             | $k_{\text{r}}$ ( $\text{s}^{-1}$ )  | $102 \pm 12$     | $103 \pm 8$     | $111 \pm 9$     | $61 \pm 4$      |
|             | $K_{\text{eq}}$                     | $0.372 \pm 0.01$ | $0.42 \pm 0.04$ | $0.40 \pm 0.02$ | $0.55 \pm 0.01$ |

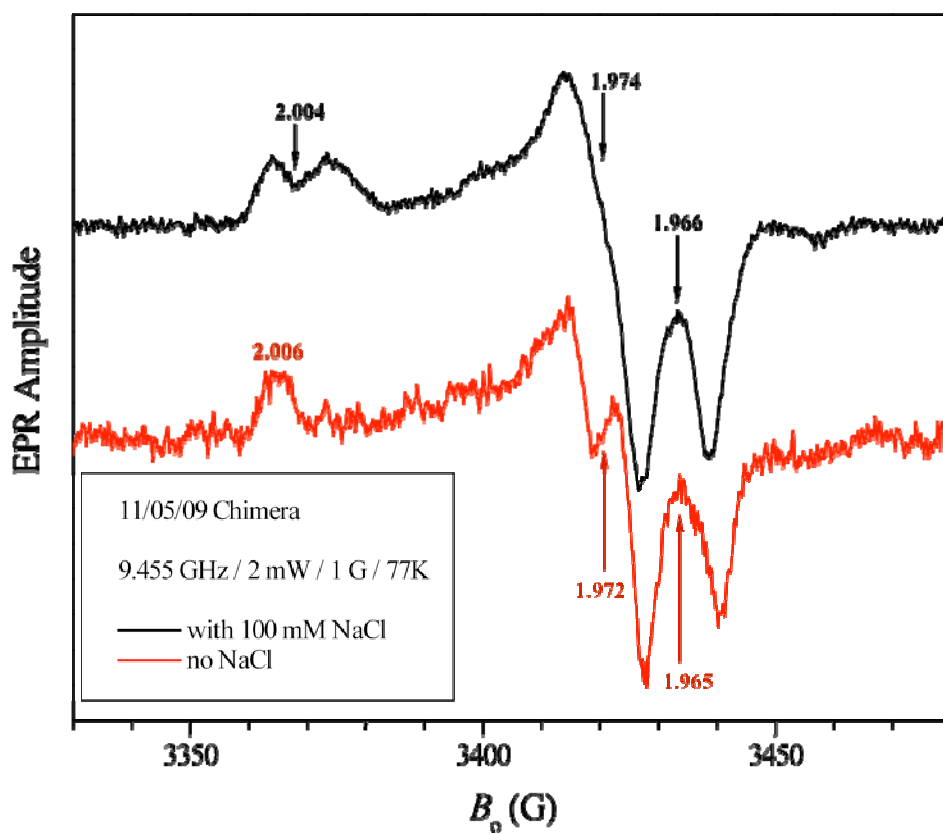

Figure FS1 CW EPR spectra of HSO chimera at pH 5.8.
